# Supplementary material for: Requirement of Stat3 Signaling in the Postnatal Development of Thymic Medullary Epithelial Cells
Source: PLOS journal article supplement (doi:10.1371/journal.pgen.1005776), 2016-01-20
Supplement: S3 (10.1371/journal.pgen.1005776.s003) [file journal.pgen.1005776.s003]

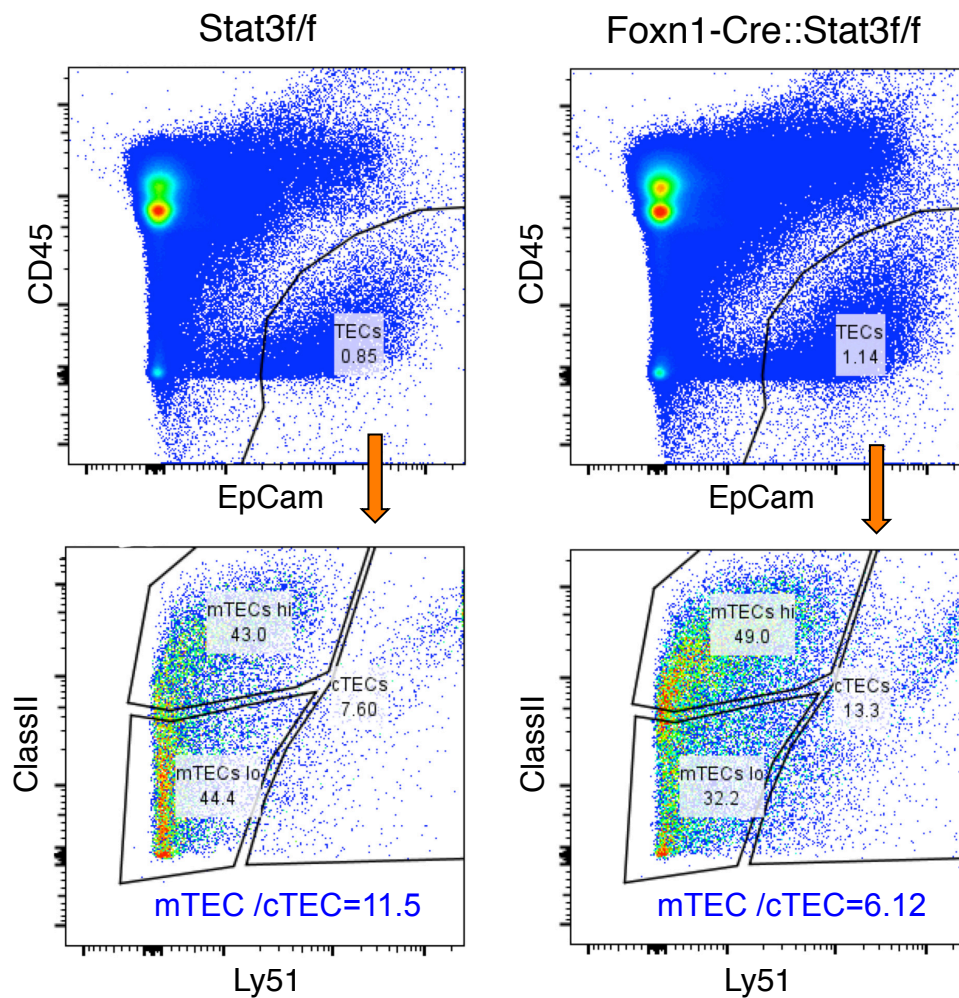

### S3 Fig. Ratio of mTECs is reduced in Foxn1-CKO thymus

Representative flow cytometric profile showing frequencies of individual TEC populations from 8 weeks old *Stat3f/f* and *Foxn1Cre::Stat3f/f* mice. The displayed cells were first gated on EpCAM<sup>+</sup>, CD45<sup>-</sup> (upper panel) and then according to MHC-II (I-A/I-E) and Ly51 expression to highlight medullary (mTEC) and cortical (cTEC) populations. The experiment was performed at the Weizmann institute using Foxn1-Cre knockin mice.
